# Supplementary material for: Plant-mediated biosynthesized Au/CuO catalysts for efficient glycerol oxidation to 1,3-dihydroxyacetone: effect of biomass component on catalytic activity
Source: Royal Society of Chemistry journal article supplement (doi:10.1039/d4nj03594a), 2024-01-01
Supplement: d4nj03594a1.pdf [file d4nj03594a1.pdf]

## Supporting Information

### **Plant-mediated Biosynthesized Au/CuO Catalysts for Efficient Glycerol Oxidation to 1,3-Dihydroxyacetone: Effect of Biomass Component on Catalytic Activity**

Li Cui<sup>a,b,c</sup>, Fei Wang<sup>a,b,c</sup>, Xiaoli Zhang<sup>a,b,c</sup>, Yuewen Chen<sup>a,b,c</sup>, Hai Liu<sup>a,b,c</sup>, Yihu Ke<sup>a,b,c</sup>, Yimin Wang<sup>a,b,c</sup>, \*  
Xiya Zhang<sup>a,b,c</sup>, \*

<sup>a</sup>School of Chemistry and Chemical Engineering, North Minzu University, Yinchuan 750021, PR China

<sup>b</sup>Key Laboratory for Chemical Engineering and Technology, State Ethnic Affairs Commission, North Minzu University, Yinchuan 750021, PR China

<sup>c</sup>Ningxia Key Laboratory of Solar Chemical Conversion Technology, North Minzu University, Yinchuan 750021, PR China

E-mail: 2021730@nmu.edu.cn (Yimin wang)

E-mail: 303652414@qq.com (Xiya Zhang).

## Table of contents

|                                                                                                                                                                                                          |   |
|----------------------------------------------------------------------------------------------------------------------------------------------------------------------------------------------------------|---|
| <b>Figure S1.</b> Device diagram for separating lilac extract by chromatographic column. ....                                                                                                            | 3 |
| <b>Figure S2.</b> The mass of the separated products obtained by column chromatography. ....                                                                                                             | 3 |
| <b>Figure S3.</b> HPLC chromatograms of Sloading 2. ....                                                                                                                                                 | 3 |
| <b>Figure S4.</b> HPLC chromatograms of S3. ....                                                                                                                                                         | 4 |
| <b>Figure S5.</b> HPLC chromatograms of S6. ....                                                                                                                                                         | 4 |
| <b>Figure S6.</b> XRD patterns of Au NPs prepared by reaction of extracts of Lilac leaves with different isolated products for 4 h, (a) Lilac leaf extract–Au, (b)Sloading2-Au, (c)S3-Au, (d)S6-Au. .... | 4 |
| <b>Figure S8.</b> N <sub>2</sub> adsorption and desorption curves of Au/CuO prepared with different concentrations of S3...5                                                                             | 5 |
| <b>Figure S9.</b> Pore size distribution of Au/CuO prepared with different concentrations of S3. ....                                                                                                    | 6 |
| <b>Figure S10.</b> XRD patterns of Au/CuO catalysts with different loads prepared by the isolated product S3: a = CuO, b = 0.5%-Au/CuO, c = 1%-Au/CuO, d = 2%-Au/CuO, e = 3%-Au/CuO. ....                | 6 |
| <b>Table S1.</b> BET characterization results of lilac leaf extract and different separation products -Au/CuO catalyst. ....                                                                             | 6 |
| <b>Table S2.</b> BET characterization results of catalysts prepared with different concentrations of S3.....                                                                                             | 7 |
| <b>Table S3.</b> BET characterization results of four different loads of S3-Au/CuO catalysts. ....                                                                                                       | 7 |
| <b>Table S4.</b> BET characterization results of catalysts prepared at different calcination temperatures for the separated product S3.....                                                              | 7 |
| <b>Table S5.</b> ICP analysis of Au/CuO catalysts prepared from different plant isolates.....                                                                                                            | 7 |

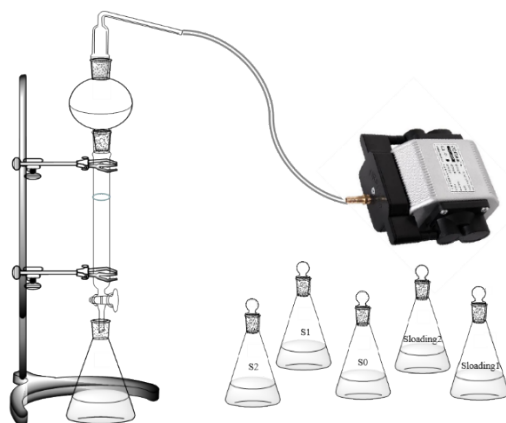

**Figure S1.** Device diagram for separating lilac extract by chromatographic column.

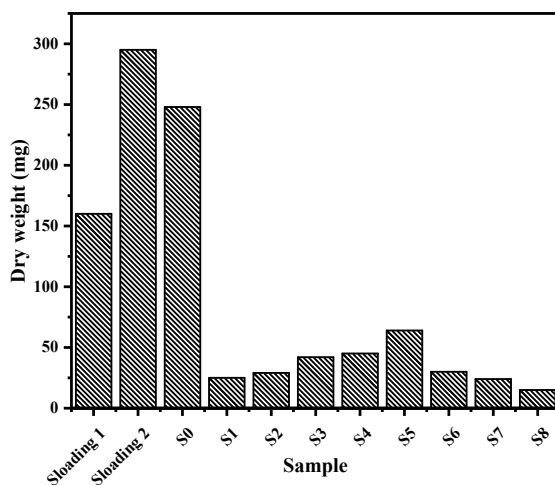

**Figure S2.** The mass of the separated products obtained by column chromatography.

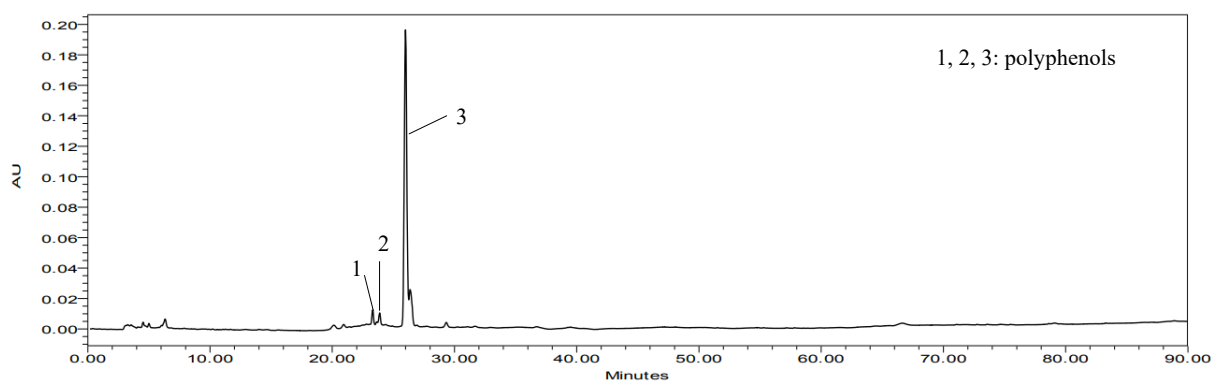

**Figure S3.** HPLC chromatograms of Slouding 2.

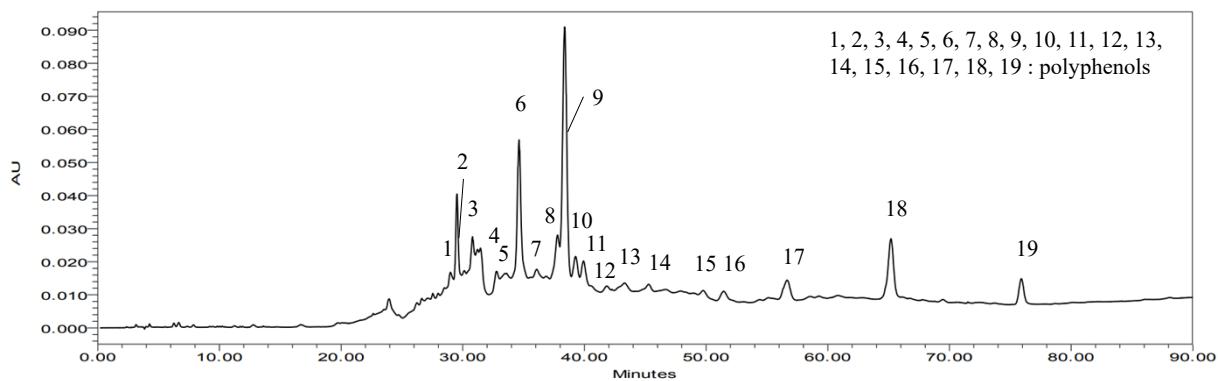

**Figure S4.** HPLC chromatograms of S3.

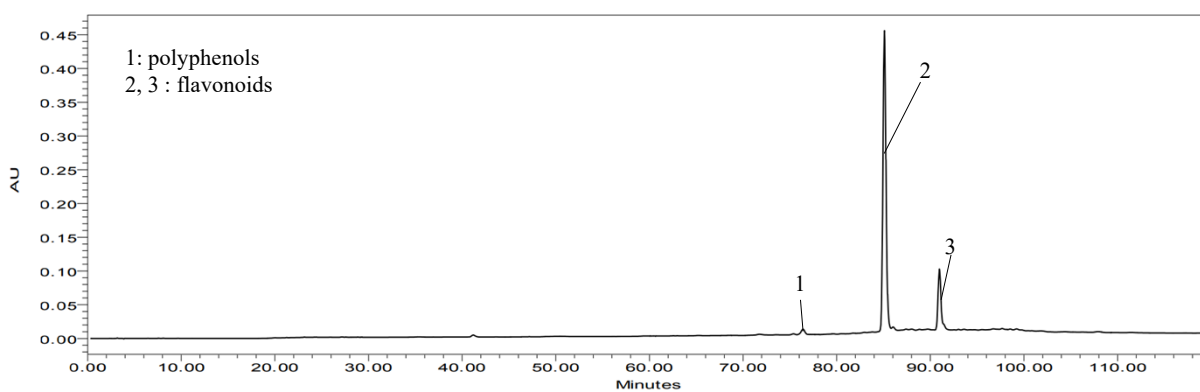

**Figure S5.** HPLC chromatograms of S6.

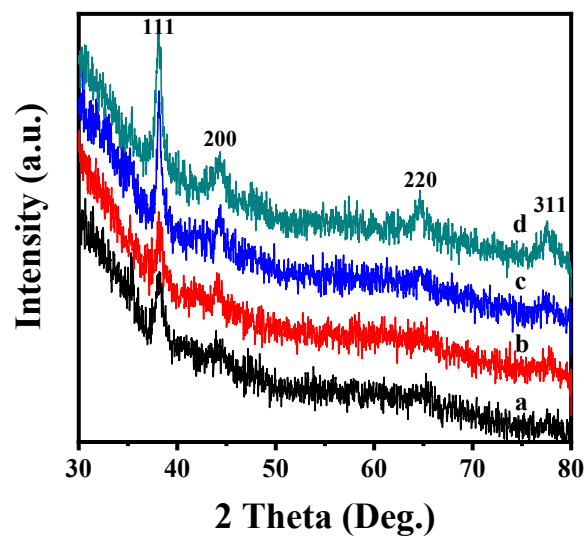

**Figure S6.** XRD patterns of Au NPs prepared by reaction of extracts of Lilac leaves with different isolated products for 4 h, (a) Lilac leaf extract–Au, (b)Sloading2-Au, (c)S3-Au, (d)S6-Au.

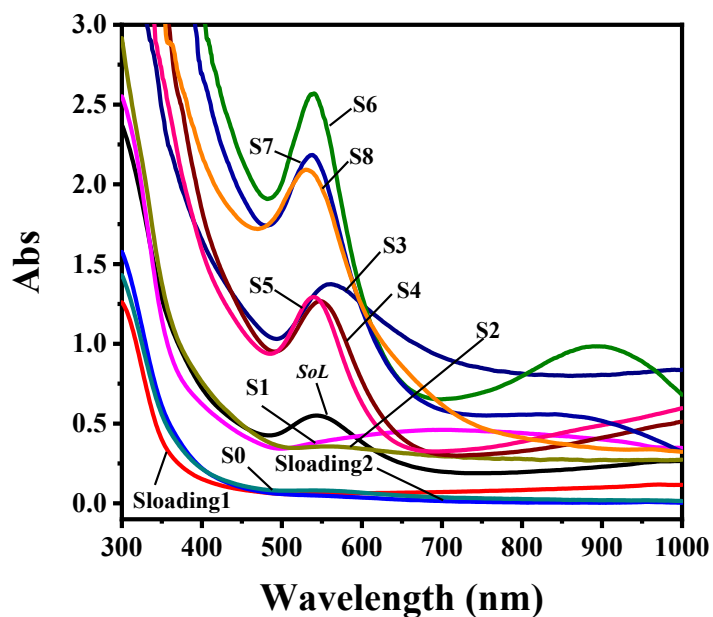

**Figure S7.** UV-Vis spectra of Au NPs prepared by reaction of extracts of *SoL* leaf syringae with different isolated products for 2 h.

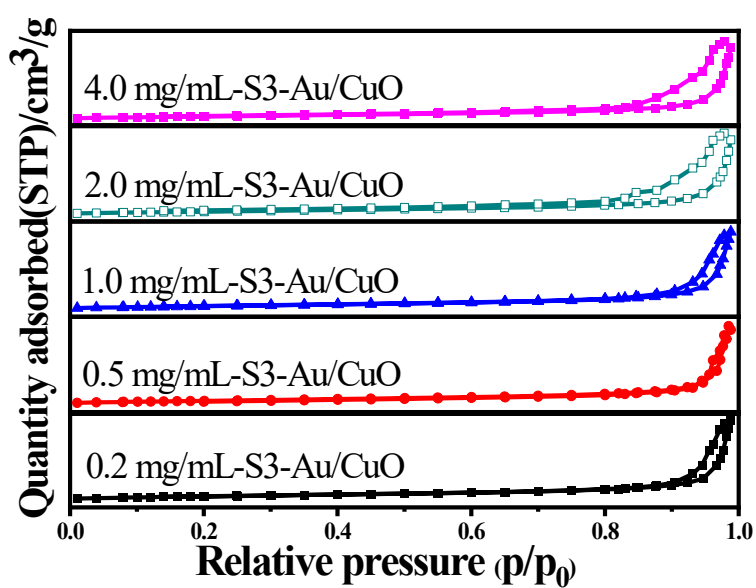

**Figure S8.** N<sub>2</sub> adsorption and desorption curves of Au/CuO prepared with different concentrations of S3.

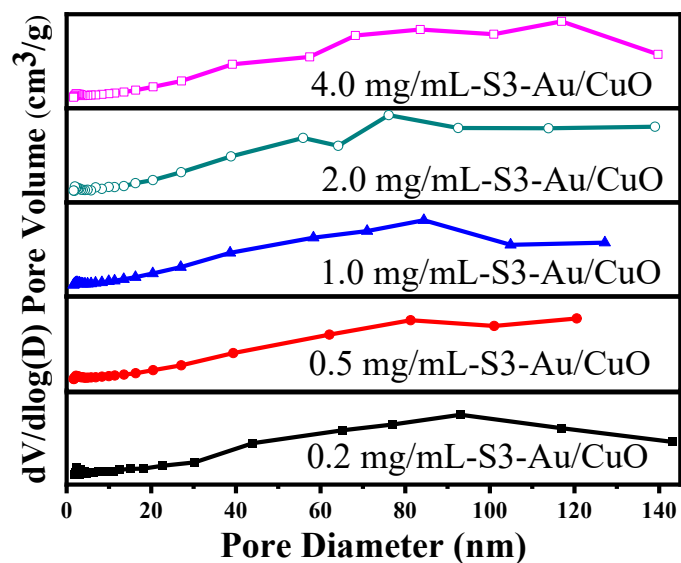

**Figure S9.** Pore size distribution of Au/CuO prepared with different concentrations of S3.

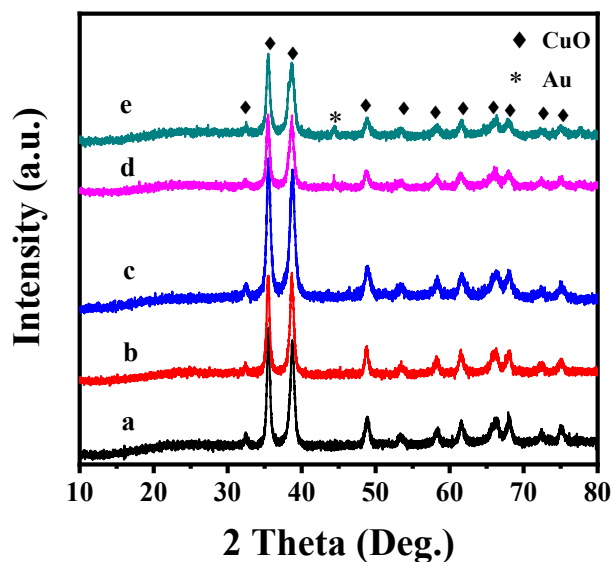

**Figure S10.** XRD patterns of Au/CuO catalysts with different loads prepared by the isolated product S3: a = CuO, b = 0.5%-Au/CuO, c = 1%-Au/CuO, d = 2%-Au/CuO, e = 3%-Au/CuO.

**Table S1.** BET characterization results of lilac leaf extract and different separation products -Au/CuO catalyst.

| Catalysts          | $S_{\text{BET}}$ ( $\text{m}^2\text{g}^{-1}$ ) | $V_{\text{P}}$ ( $\text{cm}^3\text{g}^{-1}$ ) | $D_{\text{p}}$ (nm) |
|--------------------|------------------------------------------------|-----------------------------------------------|---------------------|
| CuO                | 32.66                                          | 0.25                                          | 30.96               |
| <i>SoL</i> -Au/CuO | 26.73                                          | 0.17                                          | 25.75               |
| Sloading2-Au/CuO   | 24.70                                          | 0.18                                          | 29.00               |
| S3-Au/CuO          | 31.34                                          | 0.24                                          | 30.95               |
| S6-Au/CuO          | 29.70                                          | 0.11                                          | 14.91               |

**Table S2.** BET characterization results of catalysts prepared with different concentrations of S3.

| Catalysts             | $S_{\text{BET}}$ ( $\text{m}^2\text{g}^{-1}$ ) | $V_{\text{P}}$ ( $\text{cm}^3\text{g}^{-1}$ ) | $D_{\text{p}}$ (nm) |
|-----------------------|------------------------------------------------|-----------------------------------------------|---------------------|
| CuO                   | 32.66                                          | 0.25                                          | 30.96               |
| S3 (0.2 mg/mL)-Au/CuO | 23.61                                          | 0.18                                          | 30.96               |
| S3 (0.5 mg/mL)-Au/CuO | 28.14                                          | 0.19                                          | 27.53               |
| S3 (1.0 mg/mL)-Au/CuO | 29.18                                          | 0.20                                          | 28.09               |
| S3 (2.0 mg/mL)-Au/CuO | 31.34                                          | 0.24                                          | 30.95               |
| S3 (4.0 mg/mL)-Au/CuO | 30.22                                          | 23.27                                         | 30.80               |

**Table S3.** BET characterization results of four different loads of S3-Au/CuO catalysts.

| Catalysts   | $S_{\text{BET}}$ ( $\text{m}^2\text{g}^{-1}$ ) | $V_{\text{P}}$ ( $\text{cm}^3\text{g}^{-1}$ ) | $D_{\text{p}}$ (nm) |
|-------------|------------------------------------------------|-----------------------------------------------|---------------------|
| CuO         | 32.66                                          | 0.25                                          | 30.96               |
| 0.5% Au/CuO | 31.88                                          | 0.13                                          | 15.86               |
| 1% Au/CuO   | 31.34                                          | 0.24                                          | 30.95               |
| 2% Au/CuO   | 23.32                                          | 0.17                                          | 29.57               |
| 3% Au/CuO   | 17.42                                          | 0.13                                          | 30.81               |

**Table S4.** BET characterization results of catalysts prepared at different calcination temperatures for the separated product S3.

| Catalysts      | $S_{\text{BET}}$ ( $\text{m}^2\text{g}^{-1}$ ) | $V_{\text{P}}$ ( $\text{cm}^3\text{g}^{-1}$ ) | $D_{\text{p}}$ (nm) |
|----------------|------------------------------------------------|-----------------------------------------------|---------------------|
| Au/CuO (0°C)   | 30.14                                          | 0.22                                          | 29.34               |
| Au/CuO (200°C) | 31.06                                          | 0.25                                          | 31.63               |
| Au/CuO (350°C) | 31.34                                          | 0.24                                          | 30.95               |
| Au/CuO (500°C) | 18.12                                          | 0.13                                          | 29.77               |
| Au/CuO (650°C) | 10.70                                          | 0.09                                          | 34.99               |

**Table S5.** ICP analysis of Au/CuO catalysts prepared from different plant isolates.

| Catalysts         | Au/% | Cu/%  |
|-------------------|------|-------|
| Sloding S2-Au/CuO | 1.04 | 78.52 |
| S3-Au/CuO         | 0.96 | 78.27 |
| S6-Au/CuO         | 1.02 | 72.37 |
